# Supplementary material for: Association of BrERF72 with methyl jasmonate-induced leaf senescence of Chinese flowering cabbage through activating JA biosynthesis-related genes
Source: PubMed Central journal article supplement (PMC5928098; doi:10.1038/s41438-018-0028-z), 2018-05-01
Supplement: 41438_2018_28_MOESM1_ESM.pdf [file 41438_2018_28_MOESM1_ESM.pdf]

**Table S1.** Summary of primers used in this study.

| Assay                       | Primer sequence                           |                                                            | Restriction Site            |  |
|-----------------------------|-------------------------------------------|------------------------------------------------------------|-----------------------------|--|
| RT-qPCR                     |                                           | Forward primer(5'-3')                                      | Reverse primer(5'-3')       |  |
|                             | <i>BrActin1</i>                           | CGCTTAACCCGAAAGCTAAC                                       | TACGCCACTAGCGTAAAG          |  |
|                             | <i>BrOPR3</i>                             | CGGACCAGACCGTGTGGCATT                                      | TCATAGGCACAAGCAAGTGAGGACA   |  |
|                             | <i>BrAOC3</i>                             | CTAACGGTCCAGATTTCTCTCC                                     | GGGCTGTTTCTATCTCTCCGTT      |  |
|                             | <i>BrLOX4</i>                             | ATCAACAGAAGTAGCCCGTCCG                                     | GCACATACATCGGCAATGGTTTC     |  |
|                             | <i>BrERF72</i>                            | GAACCTGATGCTTCTGCTGCGATG                                   | TCCTCTCCTCCGTTTCTCCGTC      |  |
|                             | <i>BrSAG12</i>                            | CACTGGCGGCTTAACCACTGAA                                     | GAAGATTGGCTGTATCCTACGGC     |  |
|                             | <i>BrSAG19</i>                            | GCAAGCGAGCGTTGGTAAAGGT                                     | GGGTTGATCTTCCACTCCCTTC      |  |
|                             | <i>BrPAO1</i>                             | CAGCTTCAGCGACTCACC                                         | TCGCCGTGCTTCTTCGAT          |  |
|                             | <i>BrPPH1</i>                             | TATCTGATGCGCGGTGGAT                                        | TTCCCGACCAATGCTGGACT        |  |
|                             | <i>BrNYCI</i>                             | CGGAGACGGTGGCTAGAACG                                       | TGCTTCTCTGAGCCACGAC         |  |
| <i>BrSGRI</i>               | GTTGGGGTCCGCTTTGGGAA                      | AATCGAGCTAACCTGCGGGA                                       |                             |  |
| Subcellular localization    | <i>BrERF72-GFP-For</i>                    | ttctgccccaaatcgcgATGTGTGGCGGTGCTGTAATTTTC                  | <i>AgeI</i>                 |  |
|                             | <i>BrERF72-GFP-Rev</i>                    | tagtcataccggtcgcTCCATACGACGCGATGACATCA                     | <i>AgeI</i>                 |  |
| EMSA                        | <i>pGEX-4T-1-BrERF72-For</i>              | ggttccgctggatccATGTGTGGCGGTGCTGTAATTTTC                    | <i>BamHI</i><br><i>NotI</i> |  |
|                             | <i>pGEX-4T-1-BrERF72-Rev</i>              | agtcacgatcggcgccgTTATCCATACGACGCGATGACATCA                 |                             |  |
|                             | <i>EMSA -BrLOX4pro-For</i>                | ACATGTTATATCCGCGCGAAGCGCGGACACCGACTCTAGTTATCAGTAAAAATAAATG |                             |  |
|                             | <i>EMSA -BrLOX4pro-Rev</i>                | CATTTATTTTTACTGATAACTAGAGTCGGTGTCCGCGCTTCGCGCGGATATAACATGT |                             |  |
|                             | <i>EMSA -mLOX4pro-For</i>                 | ACATGTTATATCCGCGCGAAGCGCGGACAAAAATCTAGTTATCAGTAAAAATAAATG  |                             |  |
|                             | <i>EMSA -mLOX4pro-Rev</i>                 | CATTTATTTTTACTGATAACTAGATTTTTTGTCCGCGCTTCGCGCGGATATAACATGT |                             |  |
|                             | <i>EMSA -BrAOC3pro-For</i>                | ATGTCTTCACTAAAAACTATACCGACCAGAGTTTTGTAGACATAAATTACGAA      |                             |  |
|                             | <i>EMSA -BrAOC3pro-Rev</i>                | TTCGTAATTTATGTCTACAAAACCTCTGGTCCGTATAGTGTTTTATAGTAAGACAT   |                             |  |
|                             | <i>EMSA -mBrAOC3pro-For</i>               | ATGTCTTCACTAAAAACTATAAAAAACAGAGTTTTGTAGACATAAATTACGAA      |                             |  |
|                             | <i>EMSA -mBrAOC3pro-Rev</i>               | TTCGTAATTTATGTCTACAAAACCTCTGTTTTTATAGTGTTTTATAGTAAGACAT    |                             |  |
|                             | <i>EMSA -BrOPR3pro-For</i>                | CCTGAACCAATCATAGCCTGGCGGCTAAGTCTTACAGTTGA                  |                             |  |
|                             | <i>EMSA -BrOPR3pro-Rev</i>                | TCAACTGTAAGACTTAGCCGCCAGGCTATGATTGGTTCAGG                  |                             |  |
| <i>EMSA -mBrOPR3pro-For</i> | CCTGAACCAATCATAGCCTAAAAATAAGTCTTACAGTTGA  |                                                            |                             |  |
| <i>EMSA -mBrOPR3pro-Rev</i> | TCAACTGTAAGACTTATTTTTTAGGCTATGATTGGTTCAGG |                                                            |                             |  |
| Dual LUC assay              | <i>pBD-BrERF72-For</i>                    | tcgccgaccgtagcctATGTGTGGCGGTGCTGTAATTTTC                   | <i>Stu I</i>                |  |
|                             | <i>pBD-BrERF72-Rev</i>                    | aaccagagtaaagccctTCCATACGACGCGATGACATCA                    | <i>Stu I</i>                |  |
|                             | <i>pEAQ-BrERF72-For</i>                   | caaattcggaccggtATGTGTGGCGGTGCTGTAATTTTC                    | <i>AgeI</i>                 |  |
|                             | <i>pEAQ -BrERF72-Rev</i>                  | agtaaagcctcagTTATCCATACGACGCGATGACATCA                     | <i>XhoI</i>                 |  |
|                             | <i>0800-BrOPR3pro-For</i>                 | tataggcgcaattggTGGGCTTGTATGGTTTGGGCC                       | <i>KpnI</i>                 |  |
|                             | <i>0800-BrOPR3pro-Rev</i>                 | ttggcgtctccatggGAATTTCTGTGATCTTTTTCTCTCA                   | <i>NcoI</i>                 |  |
|                             | <i>0800-BrLOX4pro-For</i>                 | tataggcgcaattggTACCTAGCTGGACTTATTGTGGCGAC                  | <i>KpnI</i>                 |  |
|                             | <i>0800-BrLOX4pro-Rev</i>                 | ttggcgtctccatggTCCACAAATGAATAAACTGTTGCAA                   | <i>NcoI</i>                 |  |
|                             | <i>0800-BrAOC3pro-For</i>                 | tataggcgcaattggAGGCAGTCAAACAATGTGTGTGTTCA                  | <i>KpnI</i>                 |  |
|                             | <i>0800-BrAOC3pro-Rev</i>                 | ttggcgtctccatggTTTATTTCTGATGTTAAGGGAAGAC                   | <i>NcoI</i>                 |  |
| Transcription activation    | <i>pGBKT7-BrERF72-For</i>                 | catggaggccgaattcATGTGTGGCGGTGCTGTAATTTTC                   | <i>EcoR I</i>               |  |
|                             | <i>pGBKT7-BrERF72-Rev</i>                 | gccgctgcaggtcgagTTATCCATACGACGCGATGACATCA                  | <i>Sall</i>                 |  |

**Text S1.** Promoter nucleotide sequences of *BrOPR3*, *BrLOX4* and *BrAOC3*. GCC-box GCCGCC or DRE element A/GCCGAC is marked by red and boxed. Translation start site (ATG) was shown in yellow box.

*BrLOX4* (NW\_008711256.1) promoter

TCGGCTGGAAGCTAAATCGGCTGGCAGCTTTTTGGTCAAACAACCTCTGAAGGAAAAGCAGACGAAGCCACATTA  
AAGTCCTTATAGAAATGATGGATGCCAACAATTGCCTTGCAAAGGTTTTTAGACGGGTTTCGAGAACGCTATGAGGC  
AACTCTGAACAAGATTTTACAGTCTCATATCTGATAAAGGGAATGGCAAACAATATGACTTACCTCAATCAAATGA  
GGTAGCTGGACTTATTGTTGGCGACATGTCAGACACTATCTGTGAGAGAGATATAGTCGTCCAGTTTCAGTCAACTA  
ATTTGAAGGAGATACGAGATGATCATCCGCTATACATGAACCTCCAGTTCCCACTTTTATTCTCTTATGGTGATTATG  
GTTTCAATACTGAAATCCTTTTGCATTTAGAGGAAGGAAGCTCGAGGACAAGAAAATTTCTCAGTATCCGATAATTT  
TATGCTTCCCAAATACAAACGCGGTTAAAAAAAAGAATAACACTCATTAAATCTGGACAATTTTGTACTTAATTA  
ACATGTTATATCCGCGCGAAGCGCGGACACCGACCTAGTTATCAGTAAAAATAAATGAAAAGTTTAAAGCTGAACA  
TGTCCGTATTATTCAGAAAATCTAAGACTTGTTTTTTAAAAATCAGCGTACTTAGGTAAACTATGAATATTCCAATTA  
AAAAACGTGTGGACTGAGAATAAGCTTCTCTCTCCCTAAGCTAAAGCATATAAATAGCTGTGCCTGCACATTAT  
TTGTAATCAGAACGCACTAACAAAAGCTCTCAACTTCTTCTTGAAGCTTTAACCTTTTTCTGCAATCTCTTATCAC  
TTCCAAGAAACAAAACCCTCAGATTCAATCATTAGTTTGTACTAATTAATTCATTTGTGGAATG

*BrAOC3* (NW\_008711386.1) promoter

AGGCAGTCAAACAATGTGTTGTTCAAATCCGTTCTATCAGATCTGAACATTTTCATAAATATTGTTTGGAGAAAAA  
TTATGTGGGTTAACTACTTTCCTTCGAAATTCGATTCTATCAAATAATTTACTACTAATAATGATGTCTCATCATTGTG  
AATTAGAACCTCAACATTTTCAATTTATAACGATGTTTCAACAAAAATGATACTTATATTTTCGTAGTAGCAGAAATTA  
ATGTTTAGAATATTTCCAATAGTTTCAATTTTAAAAACGTAGAATAATTGTATAGTAGAGTTAAATTTTACTTTGAT  
GATATTCTACTTTAAAATAAAAATAGAATGATGAATAAAAAATAATGAATTATTTTATTTATAGAATAAACTTAGTTT  
TTACTATATATCGAGTGAAAAATAGAATATCATTAAAACATTTTACTTTAAATTATATTTTAGAAGAAAAAATATAT  
TGAAATTAGAAATGCTCTTATAGCTACGTCTTGTTCGACTATACCAACTAGTCACAAAGAAATATTTTACATCGCTGA  
AATATTTAAAGTTTTGTGACATACGACTGATCACTATGACTACTTGTAGAAACATGCCAATGAACAATATTTGGTTAT  
TAGTTGCAATGAACAAAAAATTAACACAACCTGAACAAAGTTACTAATGTCTTCACTAAAAACACTATACCGAC  
AGTTTTGTAGACATAAATTACGAAACGTATATCTTTTGCCTGTTTTGGTATCTTTCCATTACTTGGAGATCTCGTACTC  
TACTCTCTACGTAATGACTCGTTTTTTCAGTCAATTTCTCAAGCTTTCGCTTTTGAACCCGTCATGGGAAACCGAGTCG  
AAATTTACCAAAGCCATCTTTTCAATTTAGAAACCGGCCACTTTCTAAATATACGCACGTGCAAGTTACATCATCCCC  
GCATCCGTAGACTAAACACACTCATTATATAAACAAGATCTCCCAATCTCTACTCTCATAATCAATCAAACCAAGTT  
CCAAGTCTTCCCTAACATACGAAATAAATG

*BrOPR3* (NW\_008711256.1) promoter

TGGGCTTGATGGTTTGGGCGCGGGCCGTTTATAGCATTTAGACTGTAGCCGGTTTGGCTTATGGGCTTCGTGCCT  
TTTTGTTTATGCGTTTGGGCTTCAGACTATGTAATTAGGCTTGGCCCGGTTATTATTAATCTAAATAAAATCTTGAC  
GGAAAAAAGAAATGTCACACATGTACAATATGTACAAGGATCTTTTTTGAATAAGCAAGAAACAGC  
TAGACAGATACATACCTCCGGTCCCACCTGAACCAATCATAGCCTGGCGCTTAAGTCTTACAGTTGAATTGTTTCATG  
GGTTGTCCATATGGTGATGTGAACCATACACATTACACTAAATACTGATAAAAAAGGATACCAACTCTTCTATTTCGA  
CTTATGTTTTTTCGGTCTTGAATTTCTAAATCAGTTACTCTAAATCAACAACCTTATGTTTTTCAAATCTGAACTTTTATG  
TTACTCTAAATCTTCTATTTCGAGCATTTCATTTCAGTCTCAATCCCGTTATGTATGATGCTATCTTTCTTTCCCTTTTAC  
TCGAACACCTTAACTTTTGTCTGTCGGTGGTCAAAGTTGGACAAAGTCAATCCAATATTTTCTTTTAAATTATTA  
AAATTATATGAGGCCATTAAAGTTTTGTTCTGTAATTATTCTCTAAAGTTCGAATCTCAACTGTAGGACGGAGTAA  
GAAAGAAACGAGCATTATTGTGGTTAAGTTCAAAGTGGTGGTTACTCTCTAATGTCGTCAATGCATACGTCATGTAA  
ATGCAAGTGGATGGGGTCCACGGATGCATGCGTCTCAATGACGTCCACGTCCAAAGAAAAAACTTACTTTCCCTAA  
TATGTATATCTAACCAATGTGTATATTTGAACAAAAAACCCTAATGTGTATATATATATGTCGCAGATATAAC  
CATCTTCGTCCACAACCTACCAAAAACCTTGAAGTGTTTTGGAGAGAAAAAGAATCACAGAAATTC
